# Supplementary material for: Insights into carbonate environmental conditions in the Chukchi Sea
Source: Copernicus journal article supplement (doi:10.5194/bg-21-1135-2024), 2024-03-08
Supplement: Supplementary file 1 [file bg-21-1135-2024-supplement.pdf]

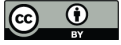

*Supplement of*

## **Insights into carbonate environmental conditions in the Chukchi Sea**

**Claudine Hauri et al.**

*Correspondence to:* Claudine Hauri ([chauri@alaska.edu](mailto:chauri@alaska.edu))

The copyright of individual parts of the supplement might differ from the article licence.

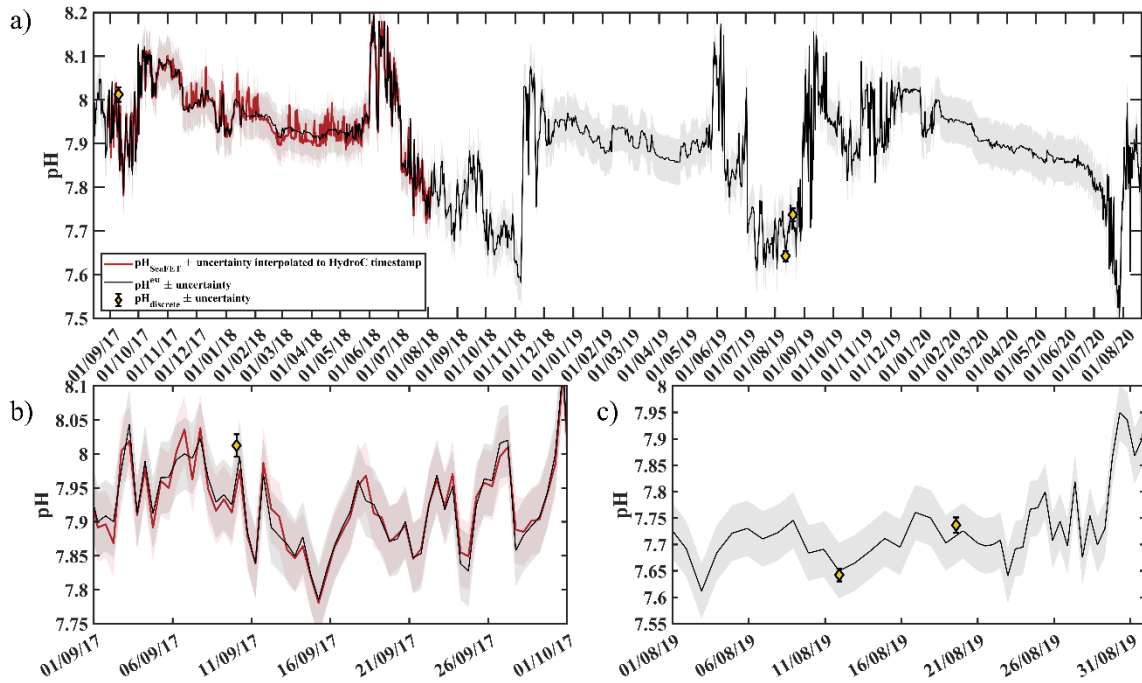

1  
 2 **Figure S1. Time series of pH with uncertainty and *in situ* reference values.** (a) Timeseries of  $\text{pH}^{\text{est}}$   
 3 (black line),  $\text{pH}_{\text{SeaFET}}$  (interpolated to HydroC timestamp; red line), and  $\text{pH}^{\text{disc}}_{\text{calc}} \pm u_c$  (yellow faced  
 4 diamonds with error bars). Uncertainty is shaded for  $\text{pH}_{\text{SeaFET}}$  (light red) and  $\text{pH}^{\text{est}}$  (gray) and shown as  
 5 error bars for  $\text{pH}^{\text{disc}}_{\text{calc}}$ . (b) Zoomed in section to highlight  $\text{pH}^{\text{disc}}_{\text{calc}} \pm u_c$  used as reference (01/09/2017  
 6 - 01/10/2017). (c) Zoomed in section to highlight  $\text{pH}^{\text{disc}}_{\text{calc}} \pm u_c$  used as references (01/08/2019 –  
 7 01/09/2019)

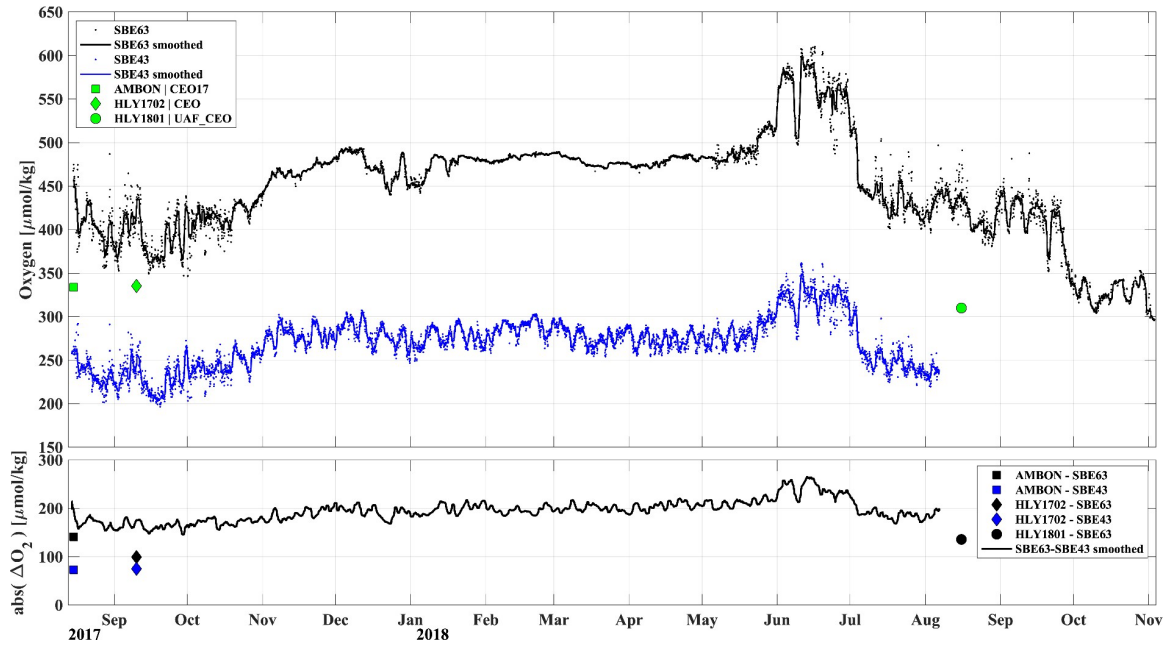

**Figure S2. Evaluation of oxygen data.** Top axes show timeseries of oxygen from a) post-calibration corrected and pumped SBE63 from 2017-2018 and 2018-2019 deployments (2 h resolution black dots, 36 hour moving mean smoothed black line), unpumped SBE43 from 2017-2018 deployment (2 h resolution blue dots, 36 hour moving mean smoothed blue line), and oxygen interpolated to moored sensor depth from AMBON 2017 cruise (green square; Danielson, 2021), HLY1702 cruise (green diamond; Cross et al., 2020a), and HLY1801 cruise (green circle; McRaven and Pickart, 2021). Bottom axes show absolute differences in oxygen between discrete or cast oxygen interpolated to moored sensor depth (AMBON=square, HLY1702=diamond, HLY1801=circle), and absolute difference between smoothed moored sensors (black line).

30 **References**

31 Cross, J. N., Monacci, N. M., Bell, S. W., Grebmeier, J. M., Mordy, C., Pickart, R. S., Stabeno, and P. J.:  
32 Dissolved inorganic carbon (DIC), total alkalinity (TA) and other variables collected from discrete  
33 samples and profile observations from United States Coast Guard Cutter (USCGC) Healy cruise  
34 HLY1702 (EXPOCODE 33HQ20170826) in the Bering and Chukchi Sea along transect lines in the  
35 Distributed Biological Observatory (DBO) from 2017-08-26 to 2017-09-15 (NCEI Accession 0208337).  
36 NOAA National Centers for Environmental Information. Dataset. <https://doi.org/10.25921/pks4-4p43>,  
37 2020.

38

39 Danielson, S.: Water temperature, conductivity, and others taken by CTD and Niskin bottles from the  
40 research vessel Norseman II Data for Arctic Marine Biodiversity Observing Network, AMBON, Program  
41 in the Chukchi Sea from 2017-08-07 to 2017-08-22 (NCEI Accession 0229072). NOAA National Centers  
42 for Environmental Information. Dataset. <https://doi.org/10.25921/afz7-0d98>, 2021.

43

44 McRaven, L. and Pickart, R.: Conductivity-Temperature-Depth (CTD) data from the 2018 Distributed  
45 Biological Observatory - Northern Chukchi Integrated Study (DBO-NCIS) cruise on USCGC (US Coast  
46 Guard Cutter) Healy (HLY1801). Arctic Data Center. doi:10.18739/A2HT2GC7Z, 2021.

47
